# Supplementary material
Source: PubMed Central journal article supplement (PMC5997252)
Supplement: NIHMS867333-supplement-Supplemental.pdf [file NIHMS867333-supplement-Supplemental.pdf]

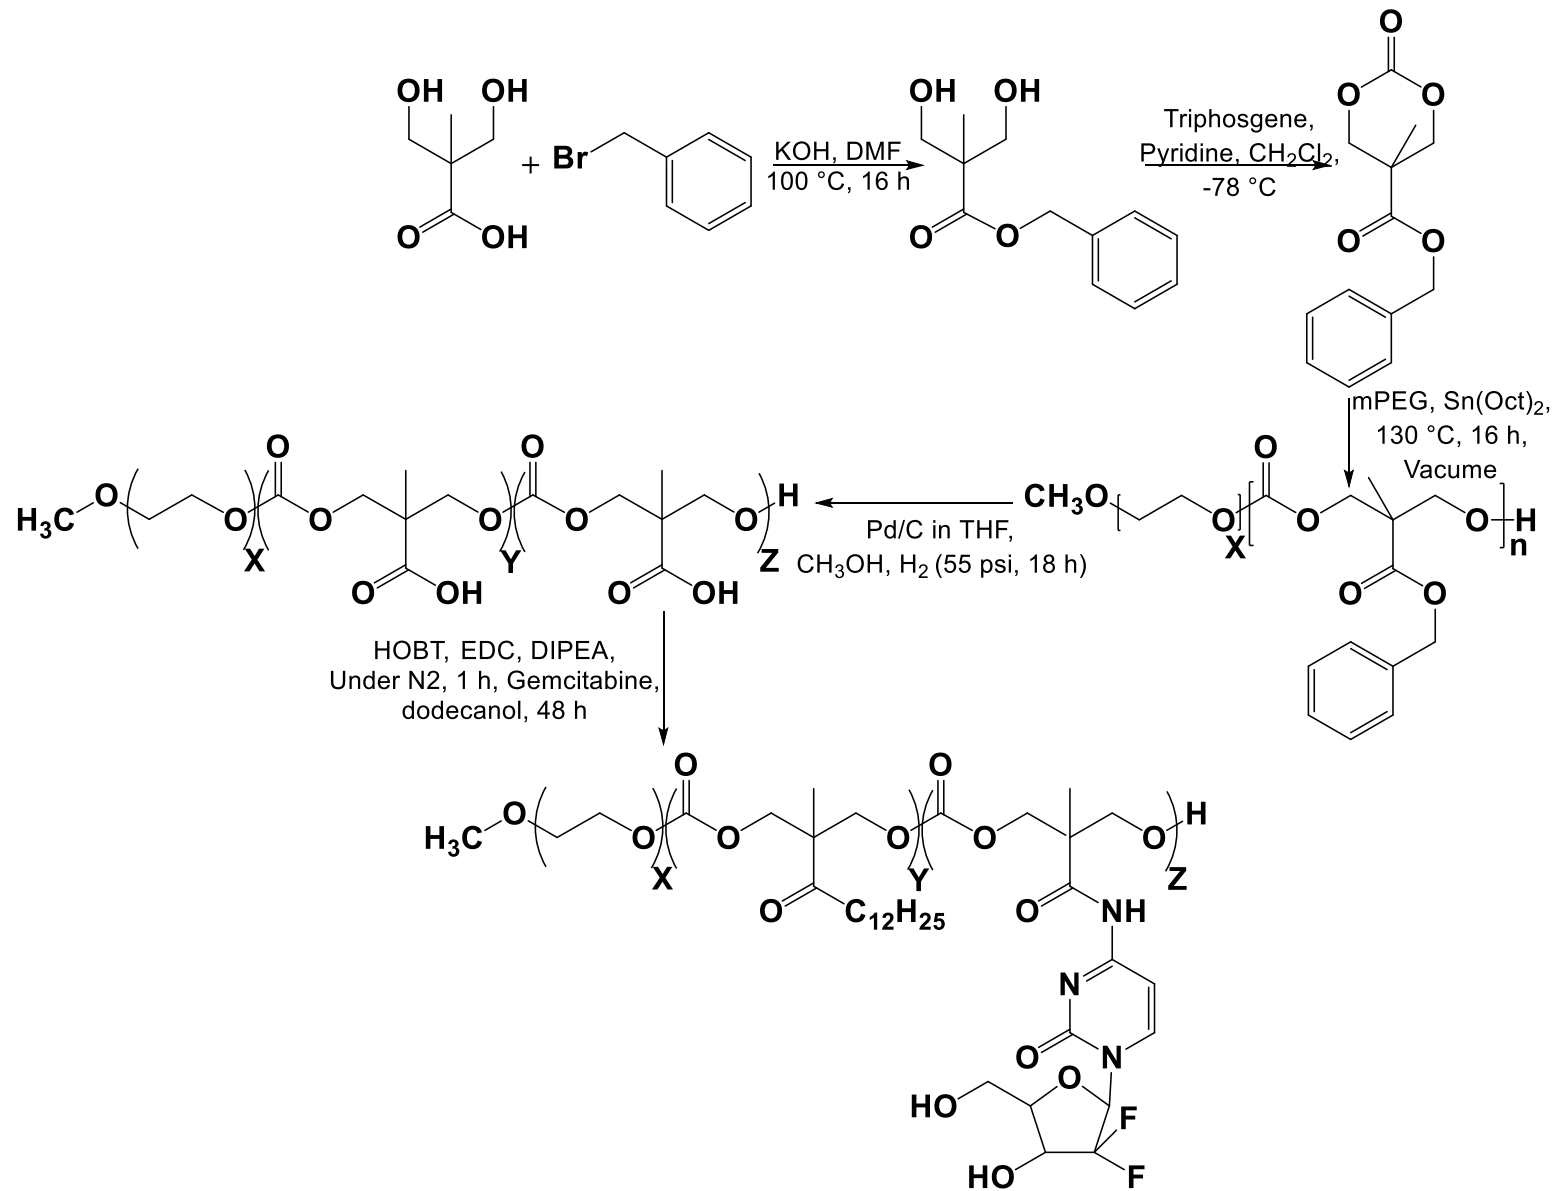

Figure S1. Synthesis scheme of mPEG-b-PCC-g-GEM-g-DC

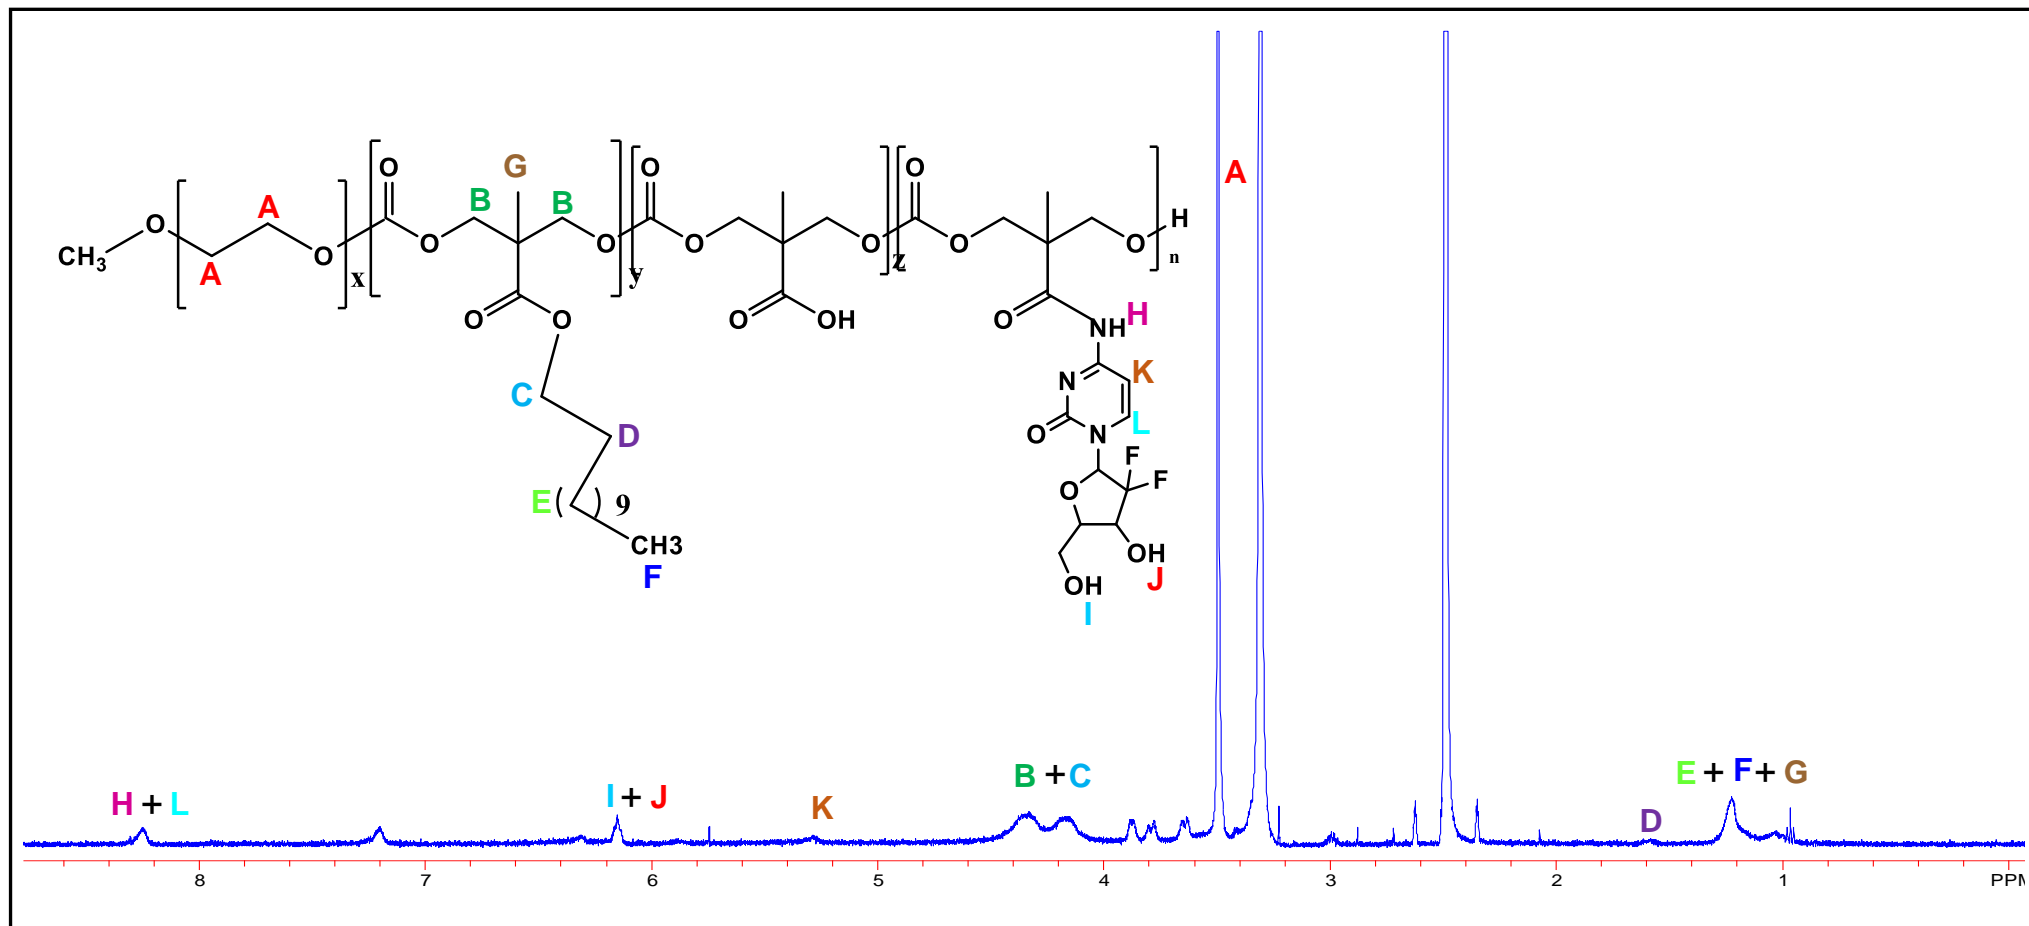

Figure S2.  $^1\text{H-NMR}$  spectra of mPEG-b-PCC-g-GEM-g-DC

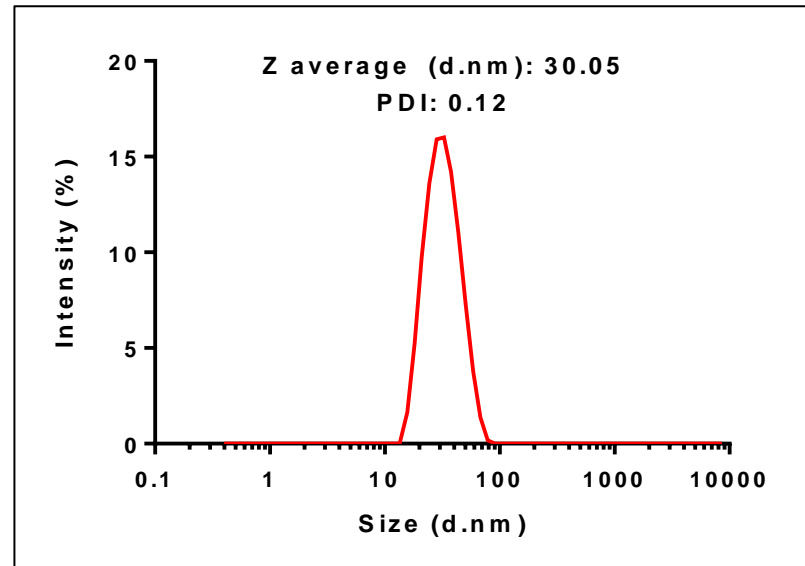

Figure S3. Particle size distribution of mPEG-b-PCC-g-GEM-g-DC micelles.

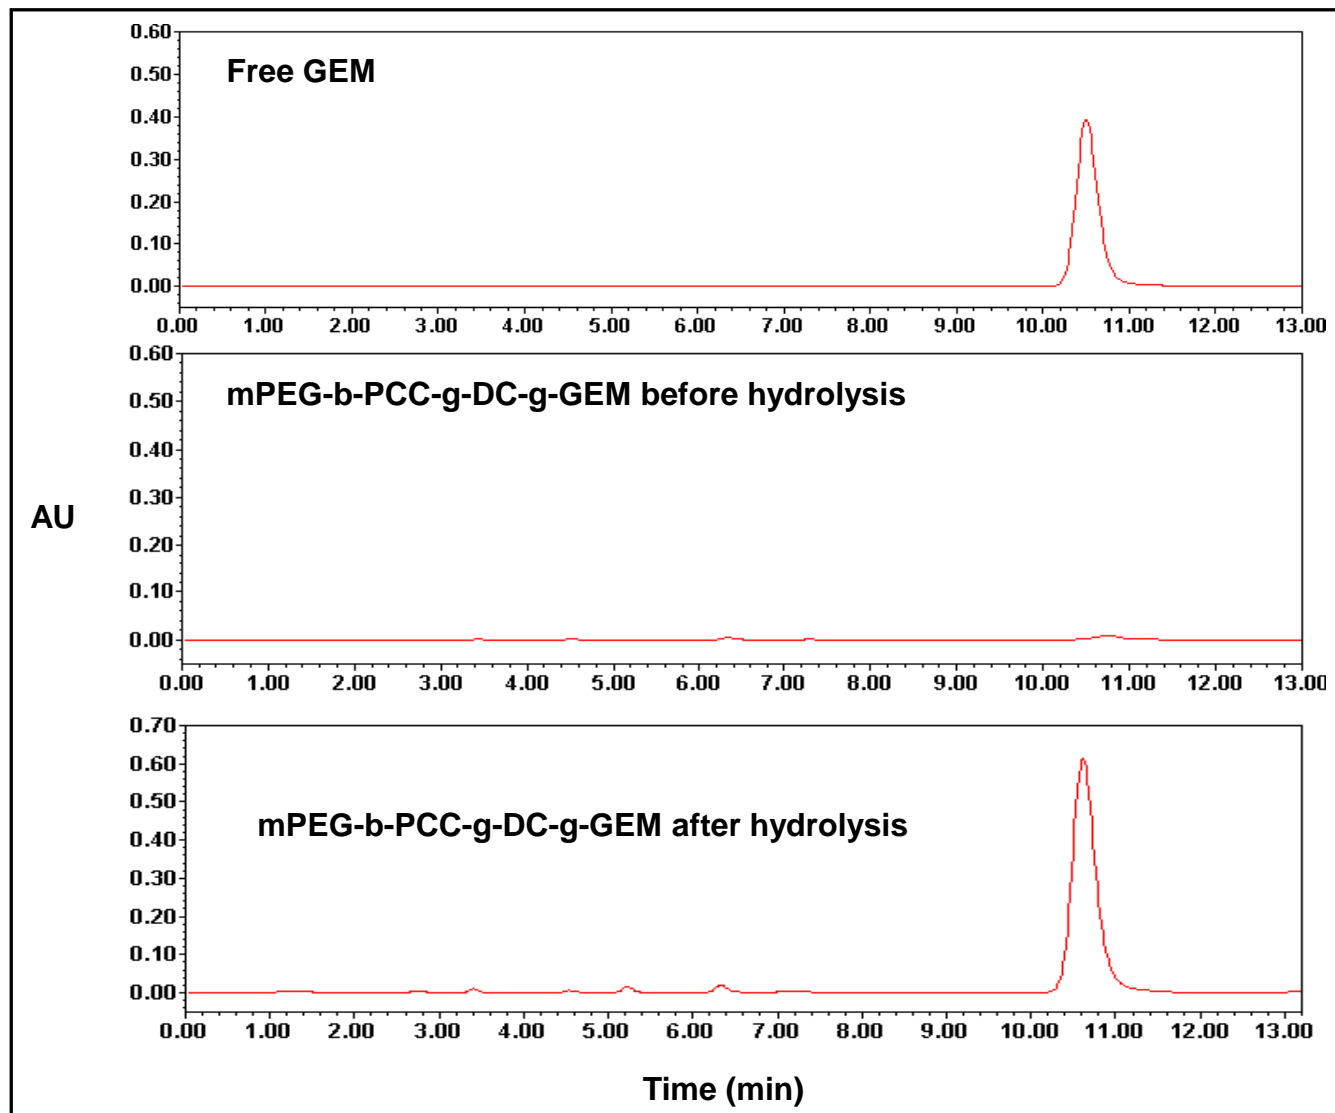

Figure S4. Gemcitabine payload in the formulation analyzed by HPLC, showing free Gemcitabine, polymer-Gemcitabine conjugate before and after hydrolysis.
